# Supplementary material for: Design of a label-free aptasensor for electrochemical determination of hemoglobin: investigation of the peroxidase-like activity of hemoglobin for the sensing of different substrates
Source: Royal Society of Chemistry journal article supplement (doi:10.1039/d3an00345k), 2023-01-01
Supplement: d3an00345k7.pdf [file d3an00345k7.pdf]

**Design of a label-free aptasensor for electrochemical determination of hemoglobin;  
Investigation of the peroxidase-like activity of hemoglobin for the sensing of different  
substrates**

Ahlem Teniou<sup>1</sup>, Amina Rhouati<sup>1\*</sup>, Selma rebai<sup>2</sup>, Gaëlle Catanante<sup>3</sup> and Jean-Louis Marty<sup>3</sup>

<sup>1</sup> Bioengineering laboratory, Higher national school of biotechnology, Constantine-Algeria

<sup>2</sup> Laboratory of Sensors, Instrumentations and Process (LCIP), University of Khenchela, Khenchela, Algeria.

<sup>3</sup> BAE laboratory, Perpignan University, Perpignan-France.

\*Correspondence: [amina.rhouati@gmail.com](mailto:amina.rhouati@gmail.com)

## **Supplementary Material**

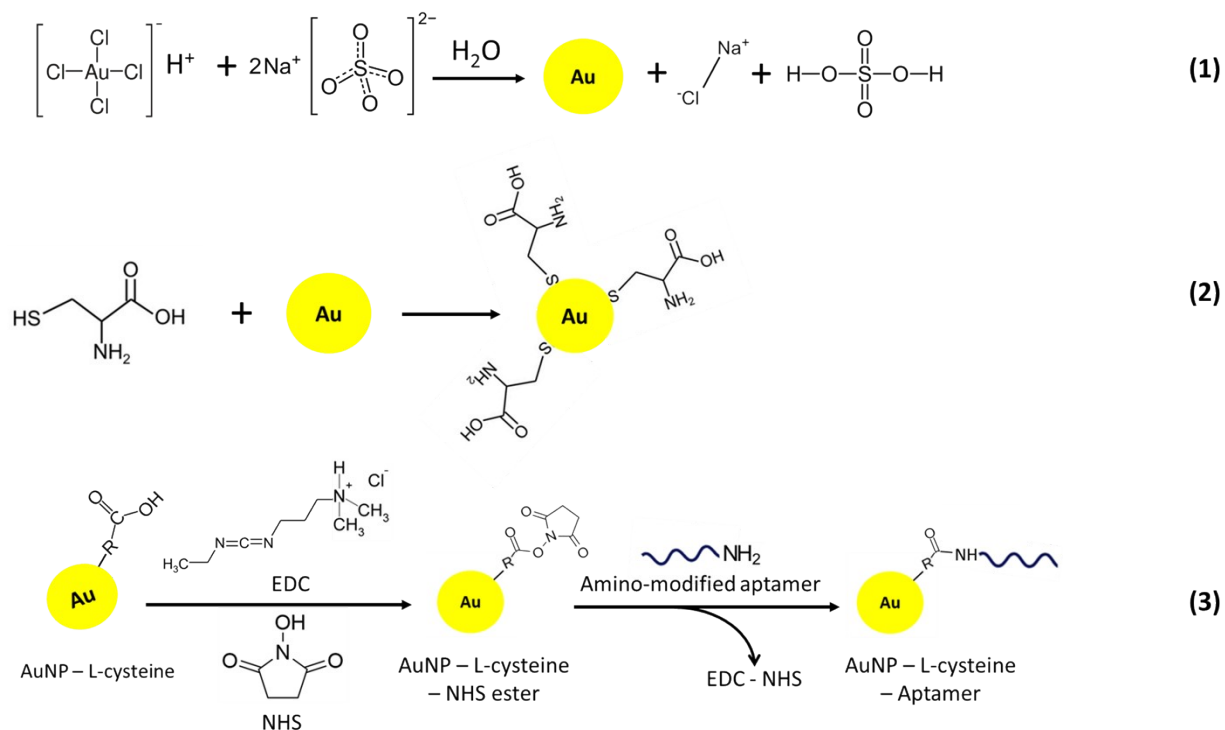

Fig. S1 Schematic representation of (1) the formation of gold nanoparticles by the interaction of Hydrogen tetrachloroaurate ( $\text{HAuCl}_4$ ) and Sodium sulfate ( $\text{Na}_2\text{SO}_4$ ); (2) the formation of cysteine modified gold nanoparticles via Au-thiol group (SH) interaction; (3) the immobilization of Aptamer on L-cysteine modified gold nanoparticles via EDC/NHS interaction.

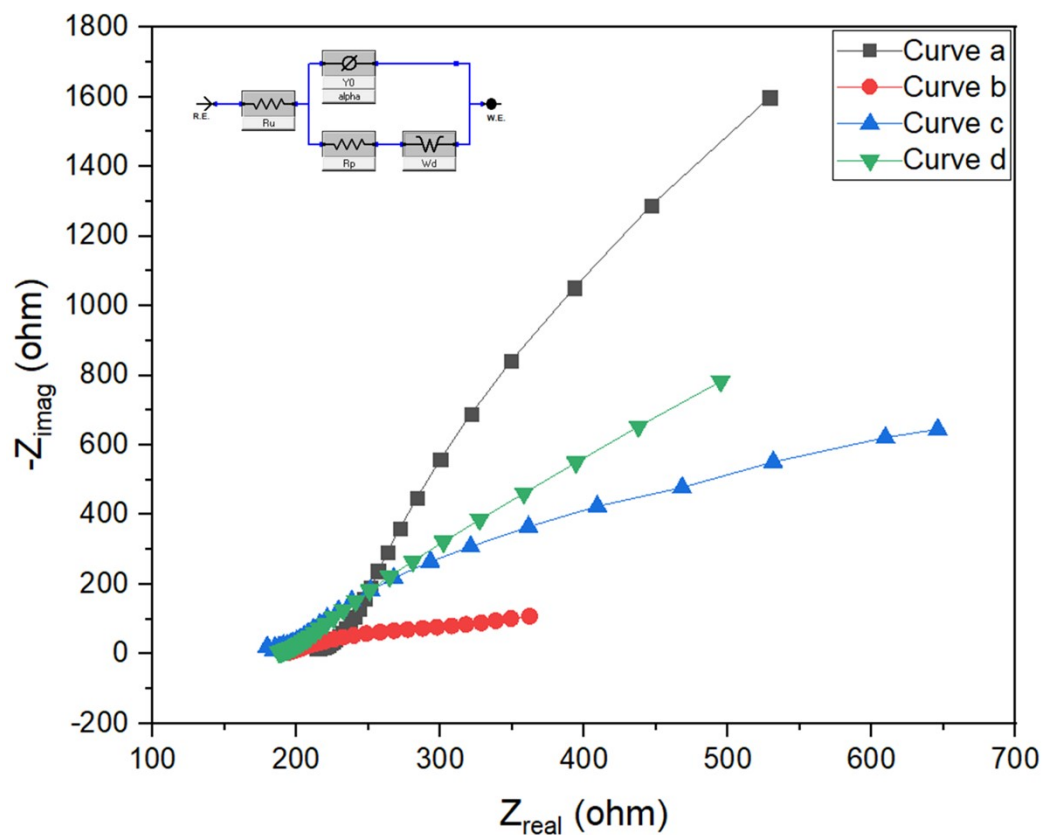

Fig. S2 Nyquist plots of 5 mM  $[\text{Fe}(\text{CN})_6]^{4-/3-}$  redox couple in PBS, pH 7.4, for bare SPCE (curve a), AuNPs /SPCE(curve b), L-cysteine/ AuNPs /SPCE (Curve c), and Aptamer/ L-cysteine/ AuNPs/ SPCE (curve d) using a frequency range of 100000 Hz - 0.1 Hz, 10 point/decade and an AC voltage of 10 mv ms. Inset: Equivalent circuit (CPE with diffusion)  $\text{Ru}(\emptyset[\text{RpWd}])$  used to fit the frequency scans along with the impedance spectra.

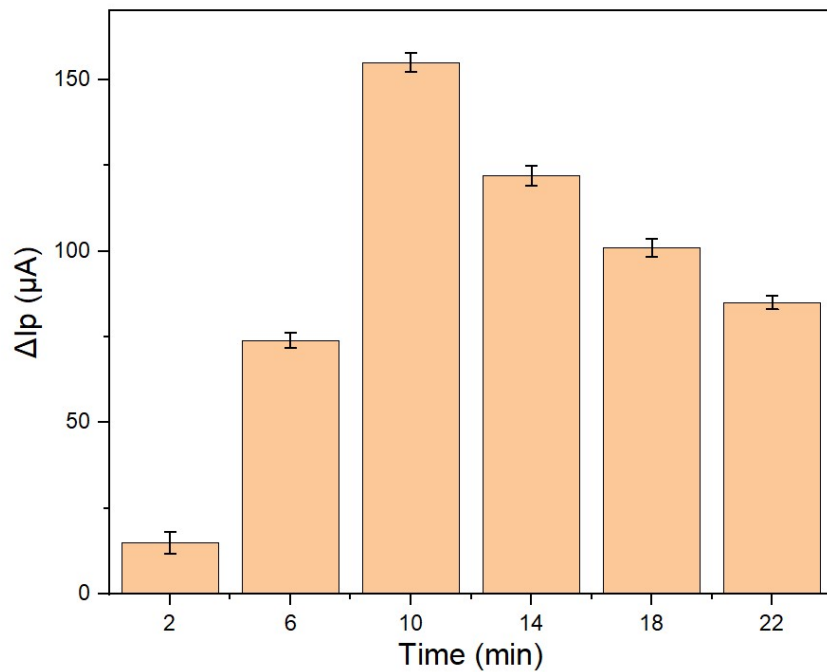

Fig. S3 Optimization of Hb-aptamer incubation time (2, 6, 10, 14, 18, 22 min). Plot of peak current difference vs. Hb incubation time obtaining from SWV in the potential range of -0.2 to +0.4 with a frequency of 7 Hz and an amplitude of 0.025V using 0.1 M PBS (pH 7.4) containing 5.0 mM  $[\text{Fe}(\text{CN})_6]^{3-/4-}$ .

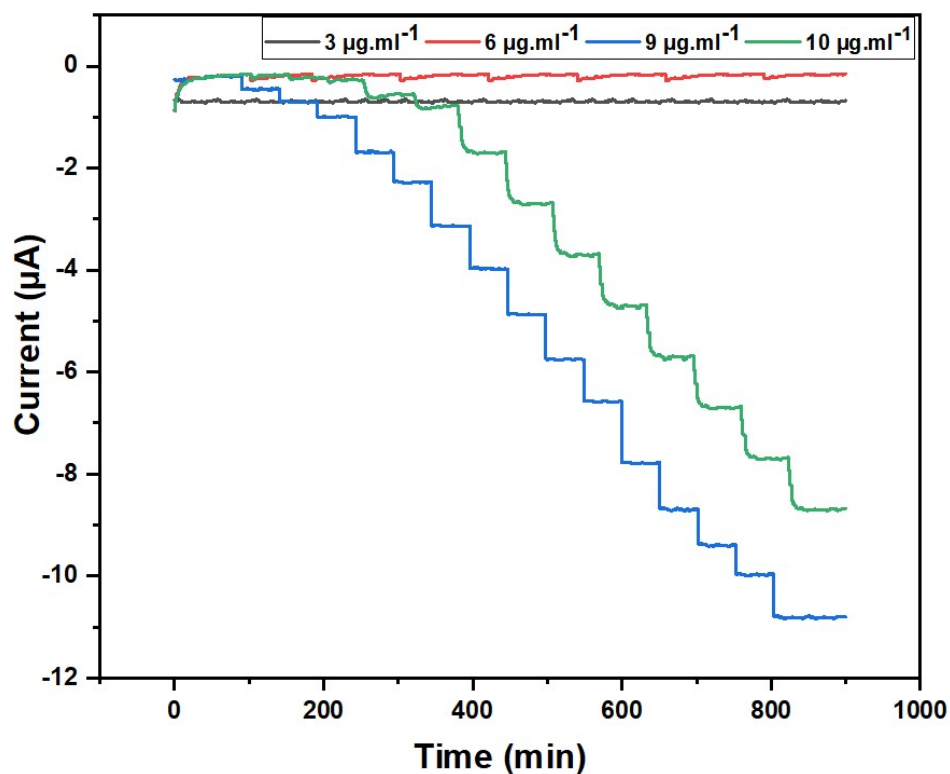

Fig. S4 Effect of Hb concentrations (3, 6, 9, 10  $\mu\text{g.ml}^{-1}$ ) on the  $\text{H}_2\text{O}_2$  electrocatalytic activity using amperometry measurements toward successive additions of  $\text{H}_2\text{O}_2$  in 0.1M PBS (pH 7) with an applied potential of -0.4V. Error bars correspond to the relative standard deviation of three independent experiments

**Table S1.** Comparison between this method and other reported electrochemical techniques for detection of  $\text{H}_2\text{O}_2$ .

| Method      | Target                 | Principle          | Linear range<br>( $\mu\text{M}$ ) | LOD<br>( $\mu\text{M}$ ) | Ref |
|-------------|------------------------|--------------------|-----------------------------------|--------------------------|-----|
| Amperometry | $\text{H}_2\text{O}_2$ | Hb-PCL/GCE         | 2 – 30                            | 6.07                     | 1   |
| Amperometry |                        | Hb-AgNPs-PAMAM/GCE | 6 – 91                            | 4.9                      | 2   |
| CV          |                        | Hb/IL/CILE         | 100 – 500                         | 40                       | 3   |

|                    |         |                                                  |                                 |         |              |
|--------------------|---------|--------------------------------------------------|---------------------------------|---------|--------------|
| Linear square wave |         | NF-Hb-Cys- AuNPs/SPCE.                           | 10 – 450                        | 4.4     | 4            |
| Amperometry        |         | Hb/Ag NPs-BDDE                                   | 0.5 – 20                        | 2.5     | 5            |
| Amperometry        |         | Hb-SWCNTs-<br>CTAB/GCEs.                         | 23.6 – 134                      | 7.87    | 6            |
| CV + Amperometry   |         | Hb/CMC–TiO <sub>2</sub> -NTs/GC                  | 4 – 64                          | 4.6     | 7            |
| Amperometry        |         | GE/Fe <sub>3</sub> O <sub>4</sub> /Hb/GCE        | 0.25 – 1700                     | 06      | 8            |
| Amperometry        |         | Hb/Aptamer/L-<br>cysteine/AuNPs/SPCE             | 0.2 – 2100                      | 0.044   | This<br>work |
| Amperometry        | Nitrite | Hb/AuNPsPTH/PtNPs/GC                             | 70×10 <sup>-3</sup> – 1200      | 0.02    | 9            |
| E                  |         |                                                  |                                 |         |              |
|                    |         | Hb/HS-CdS/GCE                                    | 0.3 – 182                       | 0.08    | 10           |
|                    |         | Hb/Au/GACS/GCE                                   | 0.05 -1000                      | 0.01    | 11           |
|                    |         | Nafion/Hb/MX-Ti <sub>3</sub> C <sub>2</sub> /GCE | 0.5 - 11800                     | 0.12μM  | 12           |
| CV                 |         | AuNPs@MoS <sub>2</sub> /GCE                      | 10 – 1100                       | 5       | 13           |
| Amperometry        |         | Hb/Apt/L-<br>cysteine/AuNPs/SPCE                 | 3.6 ×10 <sup>-3</sup> –<br>1300 | 0.00055 | This<br>work |

Abbreviations: **SPCE**: screen printed carbon electrode; **GCE**: glassy carbon electrode; **PCL**: poly( $\epsilon$ -caprolactone); **AgNPs**: silver nanoparticles; **PAMAM**: poly(amidoamine) dendrimer; **IL**: ionic liquid; **CILE**: carbon ionic liquid electrode; **NF**: nafion; **Cys**: cysteine; **BDDE**: Boron doped diamond electrodes; **SWCNTs**: single walled carbon nanotubes; **CTAB**: cetyltrimethylammonium bromide; **CMC**: Carboxymethyl cellulose; **TiO<sub>2</sub>-NTs**: Titanium oxide nanotubes; **GE**: Graphene. **GCE**: Glassy carbon electrode; **PTH**: Polythionine; **PtNPs**: Platinum nanoparticles, **AuNPs**: Gold nanoparticles, **HS-CdS**: CdS hollow nanospheres; **GACS**: Graphene with biocompatible chitosan; **MX-Ti<sub>3</sub>C<sub>2</sub>**: MXene- Ti<sub>3</sub>C<sub>2</sub>; **MoS<sub>2</sub>**: Molybdenum disulfide; **Hb**: Hemoglobin; **APT**: Aptamer; **CV**: Cyclic voltammetry

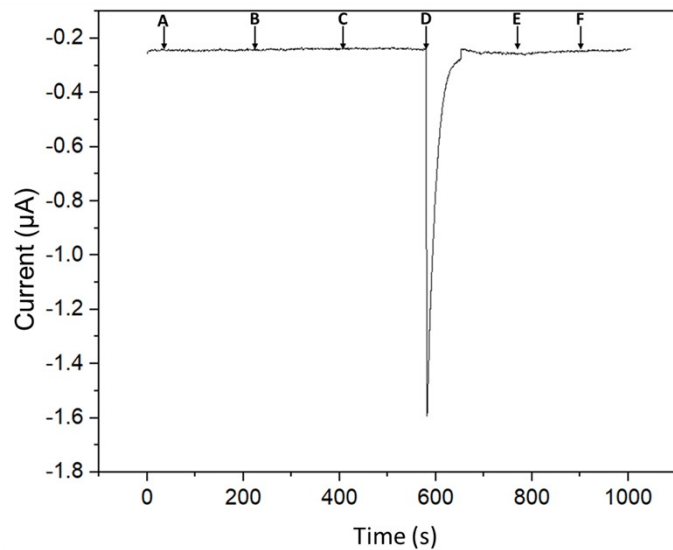

Fig. S5 Amperometric response at constant potential of -0.4 V for Hb/Aptamer/L-cysteine/AuNPs/SPCE in phosphate buffer with successive addition of 35  $\mu\text{M}$   $\text{H}_2\text{O}_2$  (D), 100 $\mu\text{M}$  ascorbic acid (A), 500 $\mu\text{M}$  dopamine (B), 100 $\mu\text{M}$  Glucose (C), 100 $\mu\text{M}$  Fructose (E), and 100 $\mu\text{M}$  Arginine (F)

**Table S2.** Determination and recovery results corresponding to  $\text{H}_2\text{O}_2$  and nitrite determination in rain water and river water samples, respectively (n = 3).

| Sample     | Added<br>( $\mu\text{M}$ ) | Founded<br>( $\mu\text{M}$ ) | RSD<br>(%) | Recovery<br>(%) |
|------------|----------------------------|------------------------------|------------|-----------------|
|            | 4.5                        | 4.3                          | 0.9        | 95.55           |
| Rain water | 100                        | 103                          | 2.01       | 103             |
|            | 800                        | 793                          | 1.56       | 99.12           |
|            | 1500                       | 1496                         | 1.3        | 99.73           |

|             |      |         |      |        |
|-------------|------|---------|------|--------|
|             | 5    | 5.18    | 1.5  | 103.6  |
| River water | 80   | 82.63   | 3.01 | 103.28 |
|             | 500  | 497.23  | 1.26 | 99.44  |
|             | 1000 | 1000.96 | 0.98 | 100.09 |

---



## References

1. W. Zheng, J. Li and Y. Zheng, *Biosensors and Bioelectronics*, 2008, **23**, 1562-1566.
2. M. Baccarin, B. C. Janegitz, R. Berté, F. C. Vicentini, C. E. Banks, O. Fatibello-Filho and V. Zucolotto, *Materials Science and Engineering: C*, 2016, **58**, 97-102.
3. A. Safavi, N. Maleki, O. Moradlou and M. Sorouri, *Electrochemistry Communications*, 2008, **10**, 420-423.
4. A. S. Elewi, S. A. W. Al-Shammaree and A. K. M. A. Al Sammarraie, *Sensing and Bio-Sensing Research*, 2020, **28**, 100340.
5. L. Jiang, J. Hu and J. S. Foord, *Electrochimica Acta*, 2015, **176**, 488-496.
6. S. Wang, F. Xie and G. Liu, *Talanta*, 2009, **77**, 1343-1350.
7. W. Zheng, Y. Zheng, K. Jin and N. Wang, *Talanta*, 2008, **74**, 1414-1419.
8. Y. Wang, H. Zhang, D. Yao, J. Pu, Y. Zhang, X. Gao and Y. Sun, *Journal of Solid State Electrochemistry*, 2013, **17**, 881-887.
9. Y. Zhang, R. Yuan, Y. Chai, J. Wang and H. Zhong, *Journal of Chemical Technology, Biotechnology and Applied Biochemistry*, 2012, **87**, 570-574.
10. Z. Dai, H. Bai, M. Hong, Y. Zhu, J. Bao and J. Shen, *Biosensors and Bioelectronics*, 2008, **23**, 1869-1873.
11. J. Jiang, W. Fan and X. Du, *Biosensors and Bioelectronics*, 2014, **51**, 343-348.
12. H. Liu, C. Duan, C. Yang, W. Shen, F. Wang and Z. Zhu, *Sensors and Actuators B: Chemical*, 2015, **218**, 60-66.
13. J. Chao, M. Zou, C. Zhang, H. Sun, D. Pan, H. Pei, S. Su, L. Yuwen, C. Fan and L. Wang, *Nanotechnology*, 2015, **26**, 274005.
