# Supplementary figures and images for: Design of a label-free aptasensor for electrochemical determination of hemoglobin: investigation of the peroxidase-like activity of hemoglobin for the sensing of different substrates
Source: Royal Society of Chemistry journal article supplement (doi:10.1039/d3an00345k), 2023-01-01

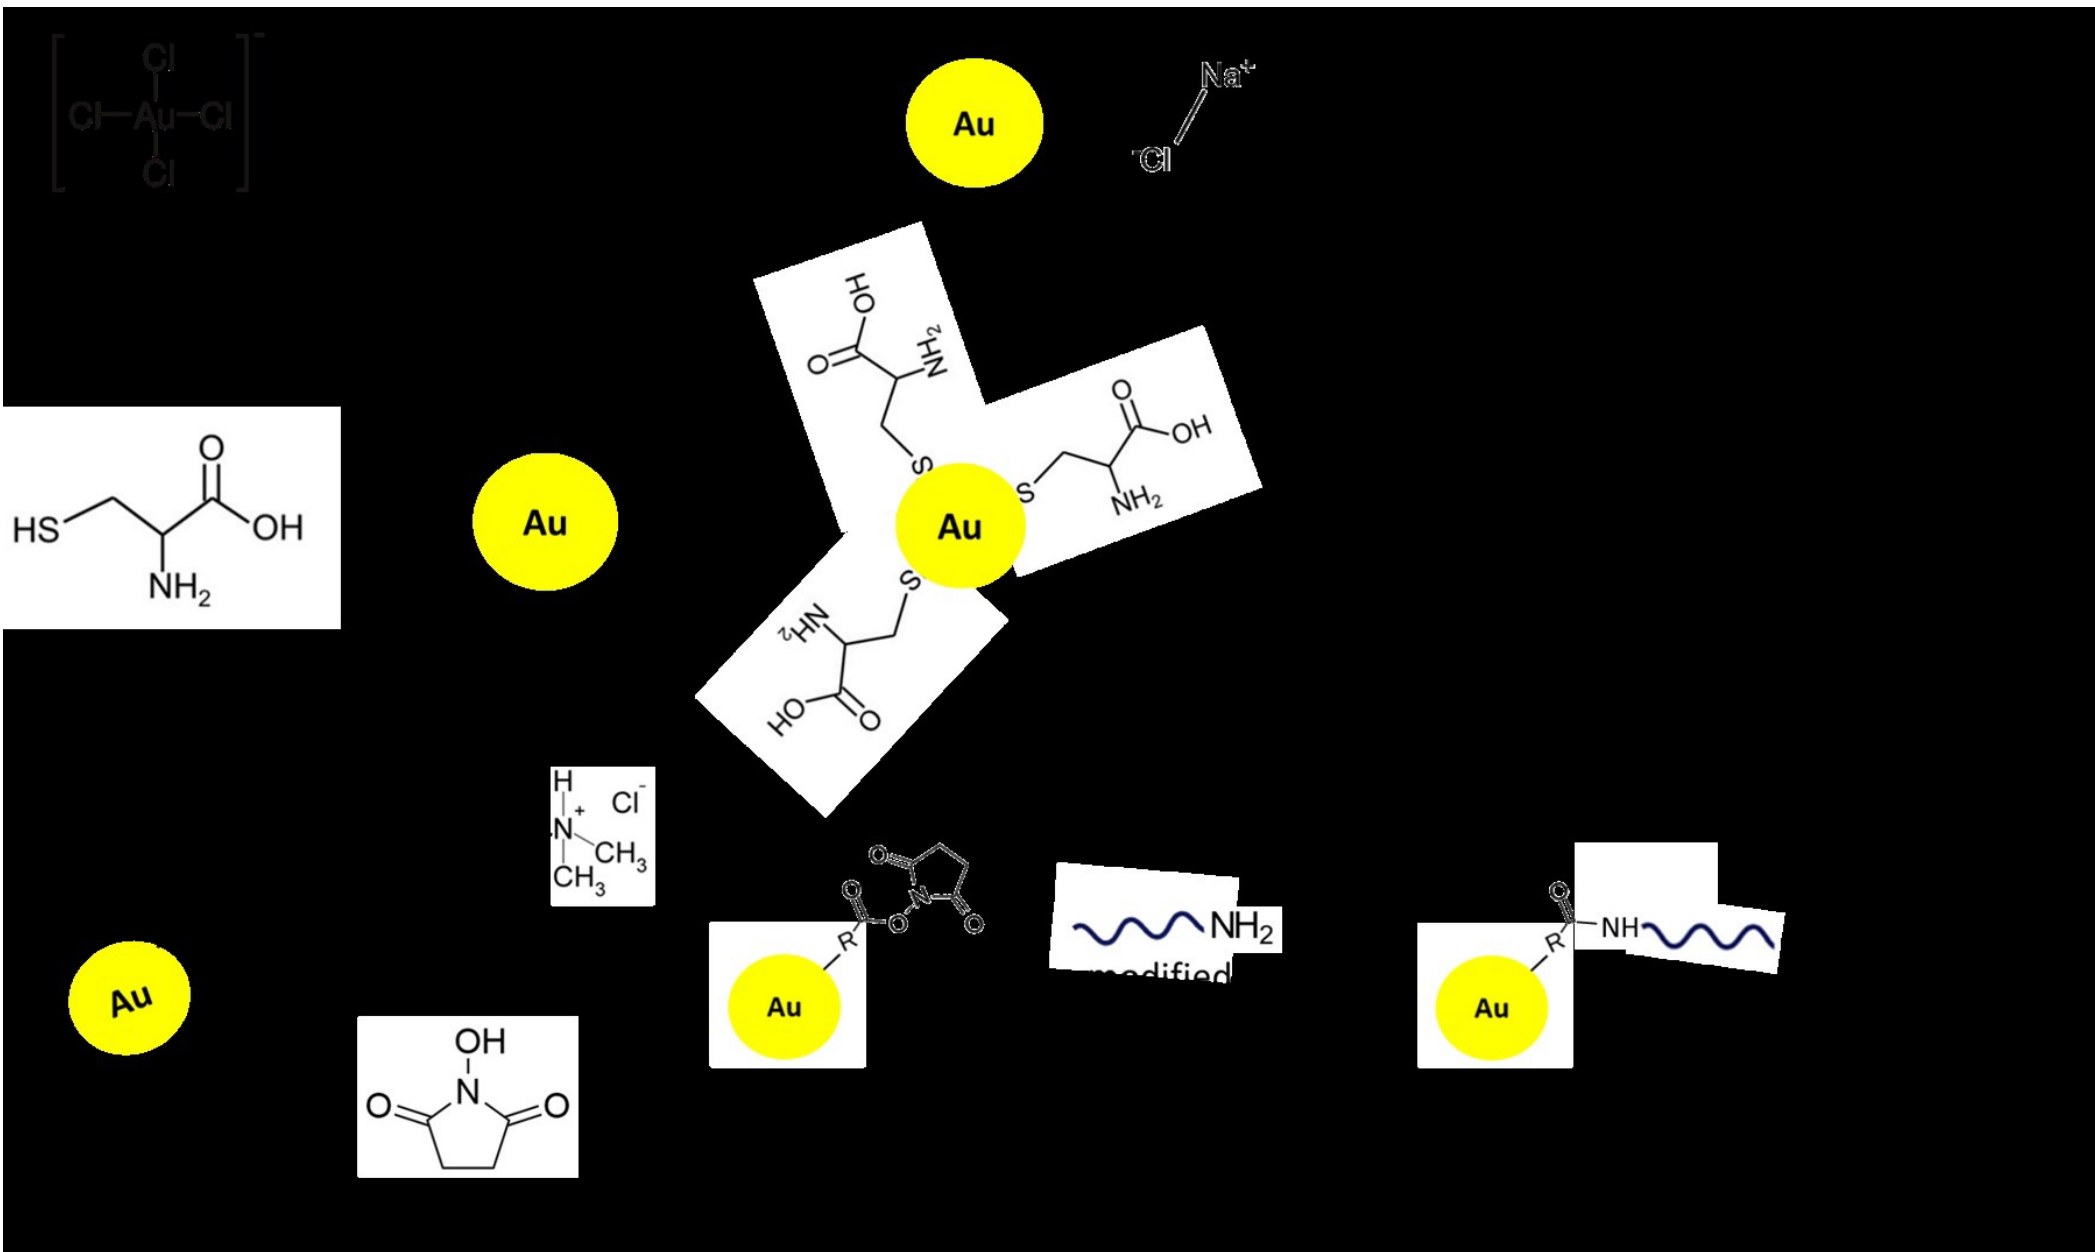

Supplement: d3an00345k2.pdf [file d3an00345k2.pdf]

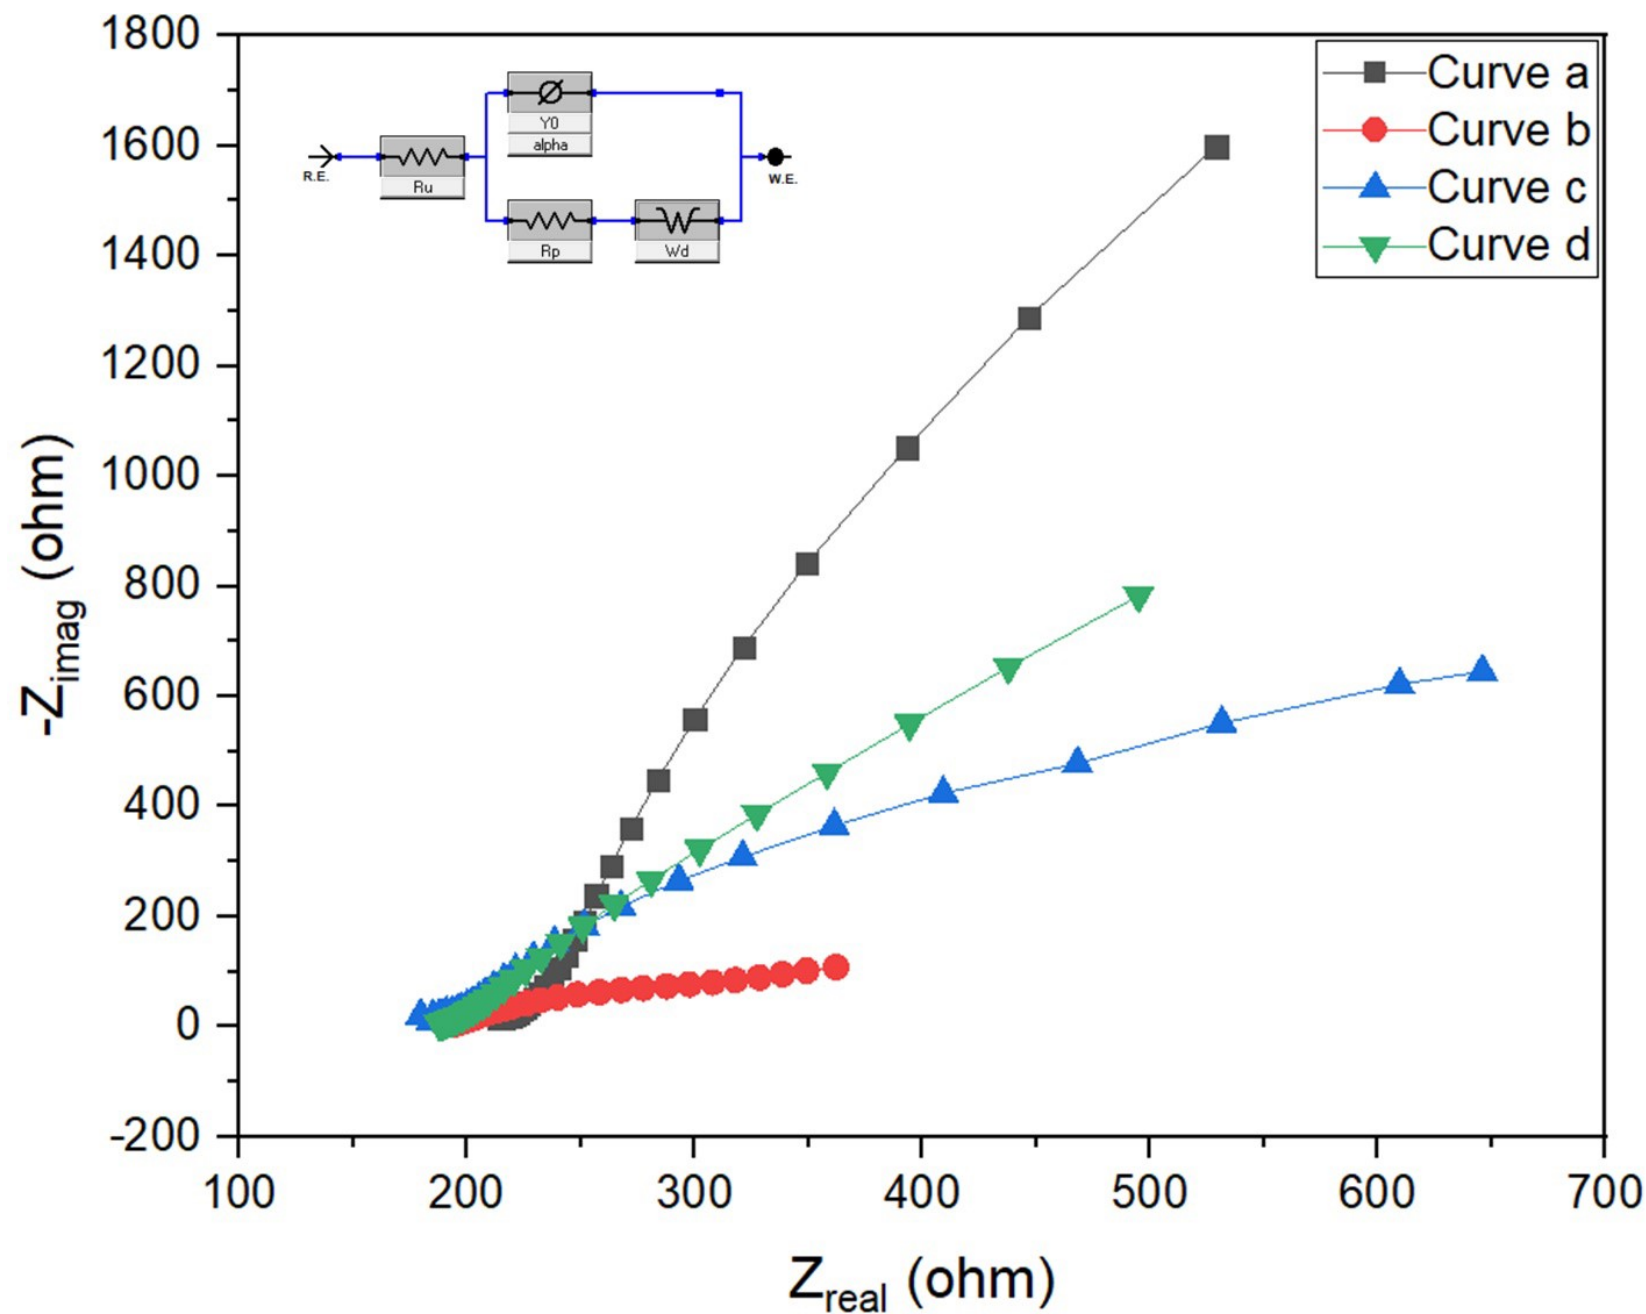

Supplement: d3an00345k3.pdf [file d3an00345k3.pdf]

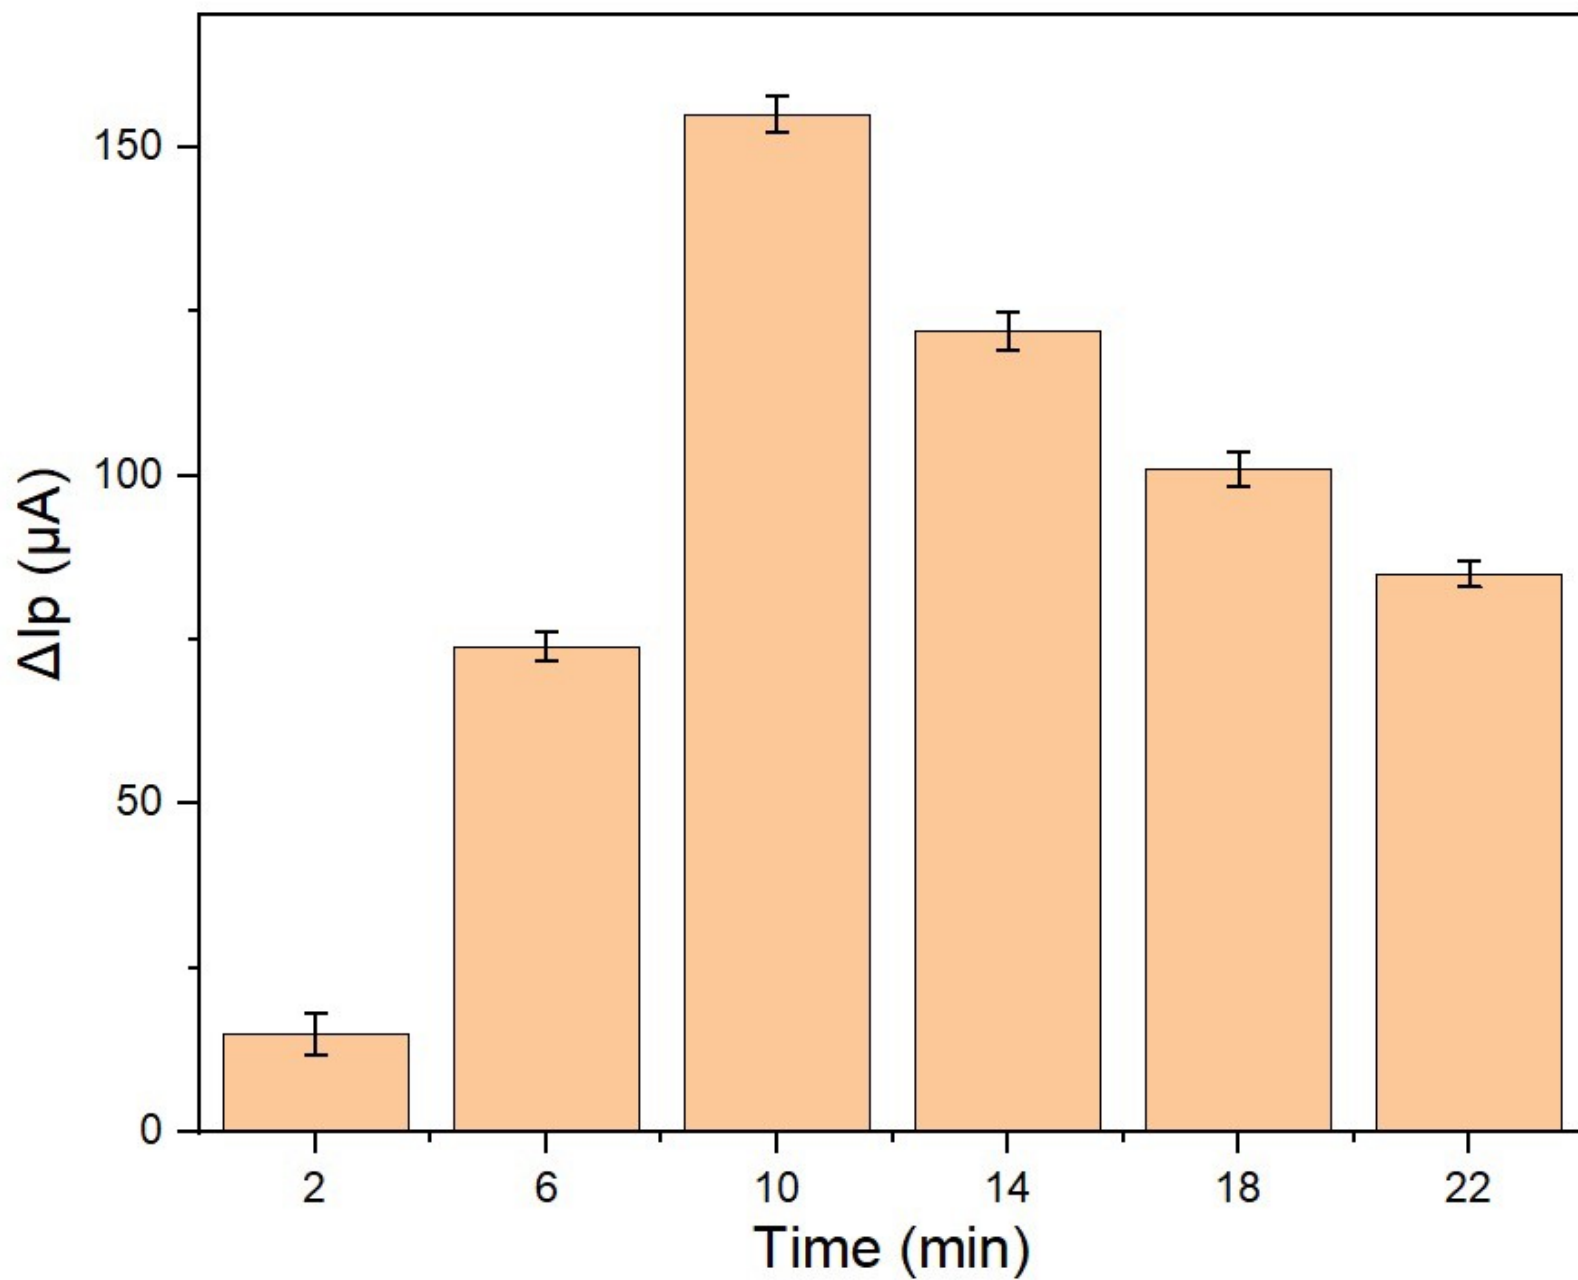

Supplement: d3an00345k4.pdf [file d3an00345k4.pdf]

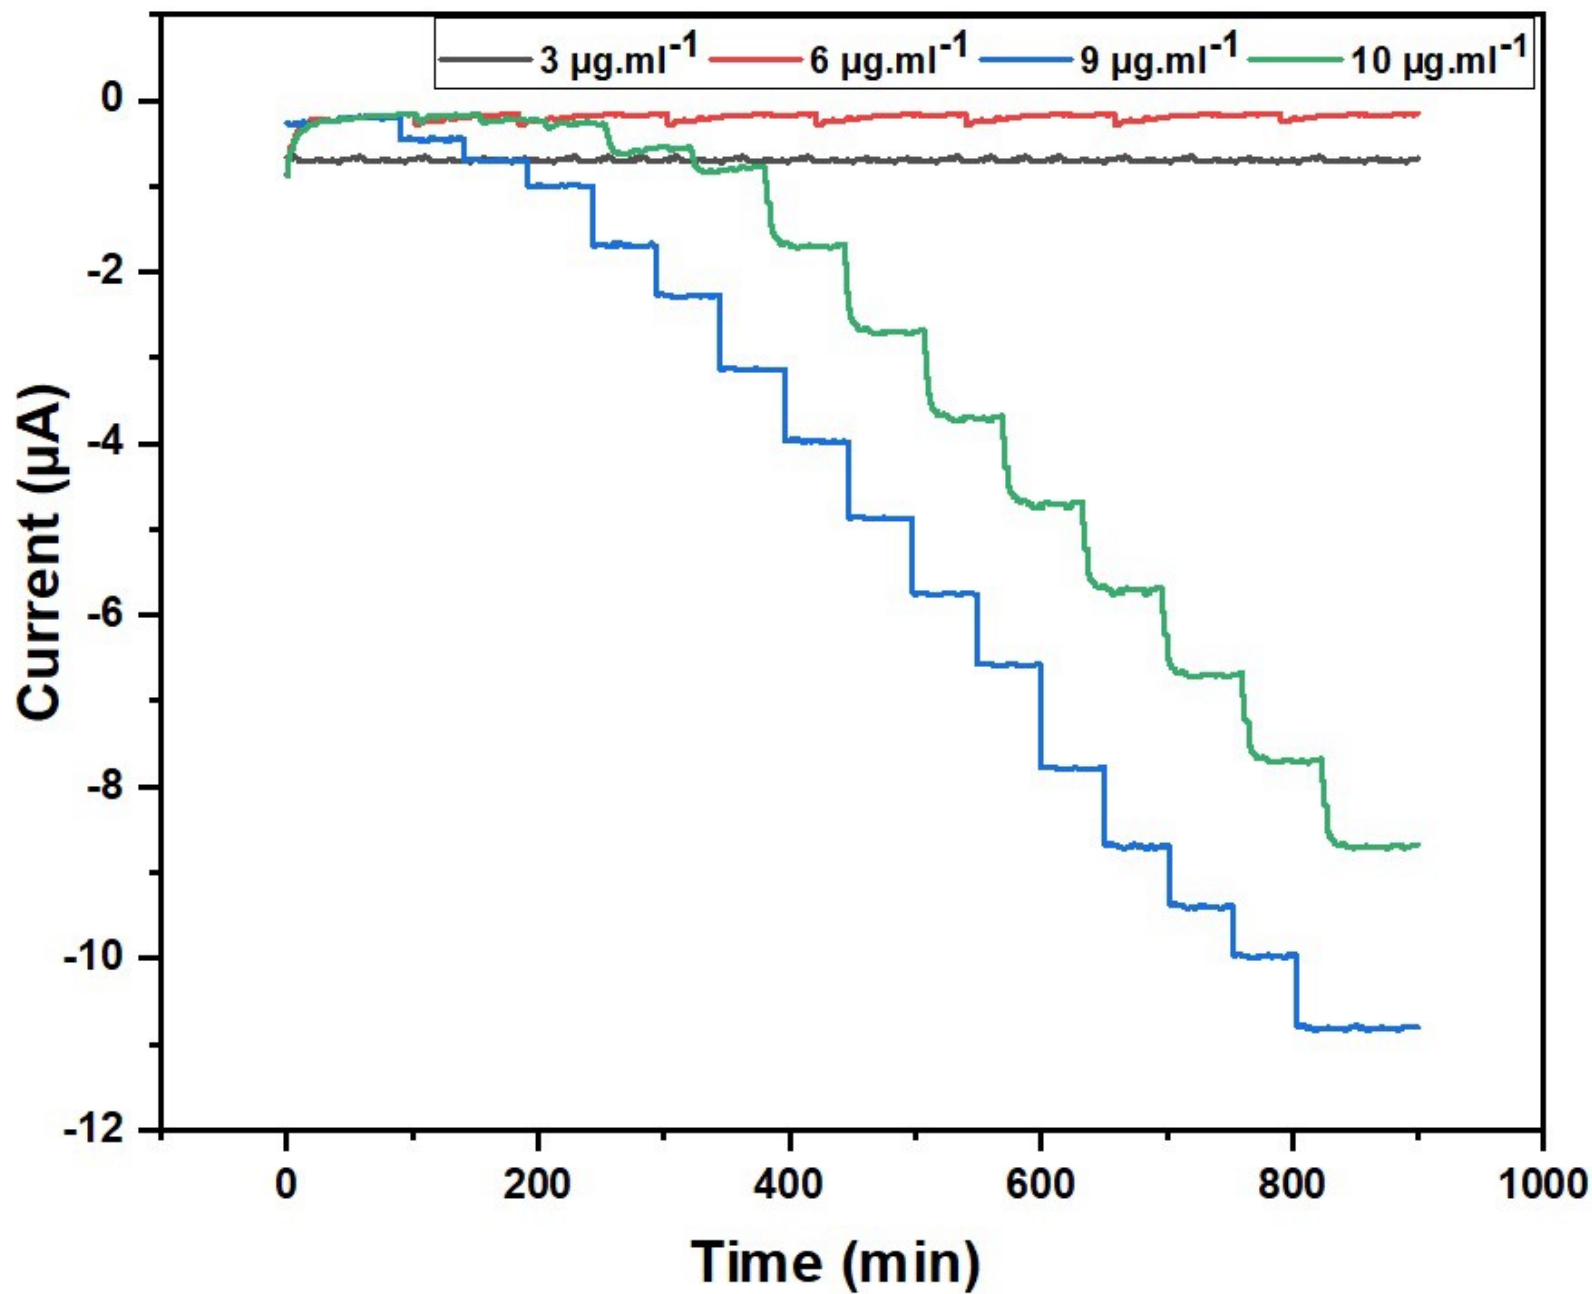

Supplement: d3an00345k5.pdf [file d3an00345k5.pdf]

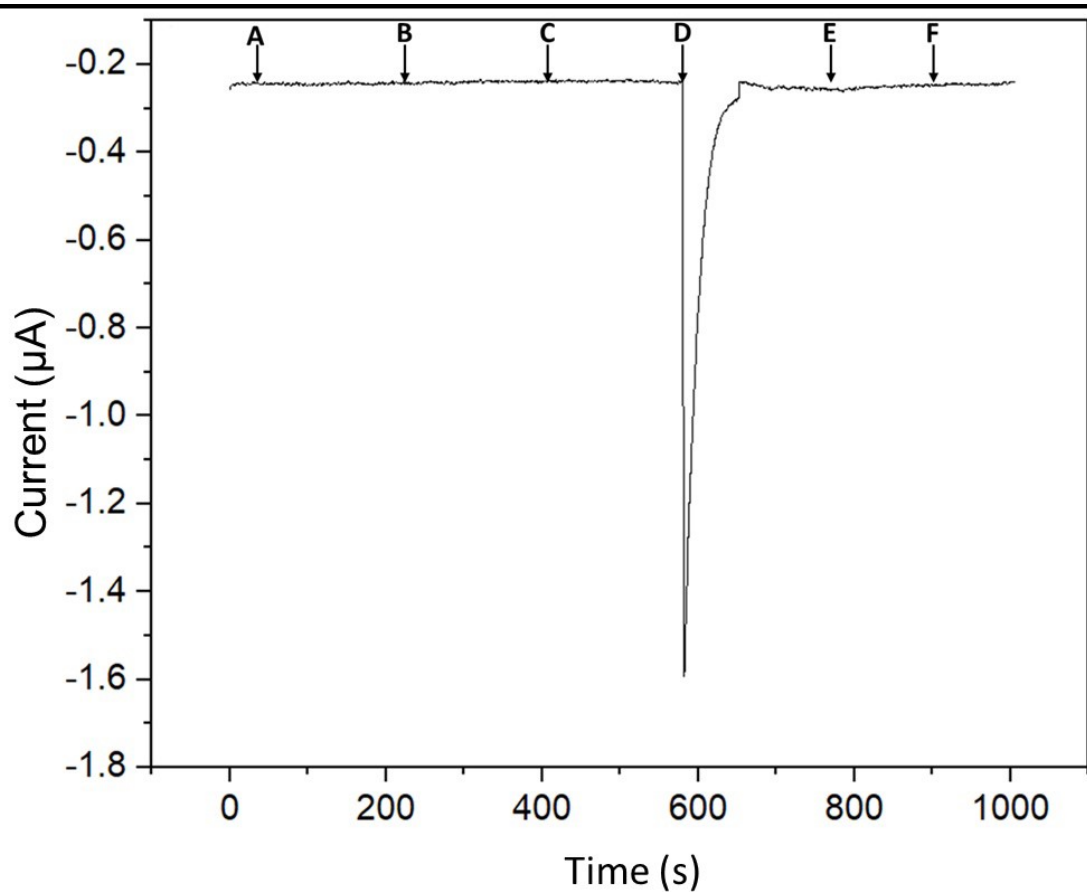

Supplement: d3an00345k6.pdf [file d3an00345k6.pdf]
